# Supplementary material
Source: Frontiers journal article supplement (https://www.frontiersin.org/articles/287171)
Supplement: Data_Sheet_5.pdf [file Data_Sheet_5.pdf]

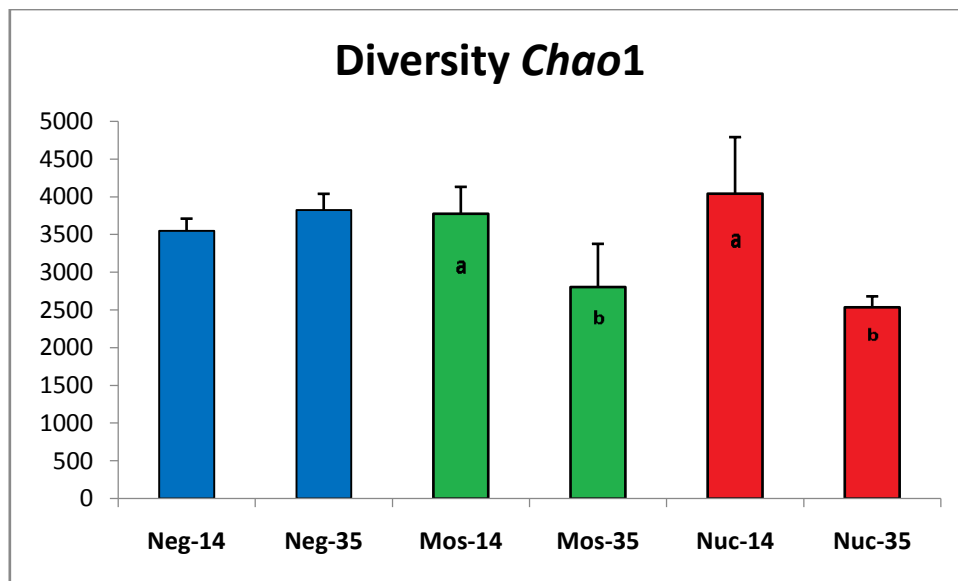

Supplementary Material 5. Chao1 index of different bacterial groups in cecum at 14 and 35 days. Different letters mean statistical difference in genera abundance between sampling times by the Tukey test ( $P < 0.05$ ). Data is shown by treatment (%), mean and standard error,  $n=4$ ). Control group (Neg), mannan-oligosaccharide (Mos) and nucleotide (Nuc).
